**Web Appendix:** Maternal exposure to nitrogen dioxide, intake of methyl nutrients and congenital heart defects in offspring

**Authors:** Jeanette A. Stingone, Thomas J. Luben, Suzan L Carmichael, Arthur S. Aylsworth, Lorenzo D. Botto, Adolfo Correa, Suzanne M. Gilboa, Peter H. Langlois, Wendy N. Nembhard, Jennifer Richmond-Bryant, Gary M. Shaw, Andrew F. Olshan and the National Birth Defects Prevention Study

## Web Appendix 1

Similar to previous research within this population (1), two-stage hierarchical regression(2) was used to estimate adjusted odds ratios and 95% confidence intervals representing the relationship between nitrogen dioxide (NO<sub>2</sub>), methyl nutrient intake and congenital heart defects (CHDs). Computer code was adapted from previous work by Witte et al.(3) Separate models were constructed for each of the five methyl nutrients (methionine, choline, dietary folate equivalents, vitamin B<sub>6</sub> and vitamin B<sub>12</sub>).

The first-stage model, an unconditional, multinomial logistic regression model, is represented by Equation 1. In this equation,  $X$  represents the seven indicator variables corresponding to the combinations between the four levels of NO<sub>2</sub> exposure and two levels of nutrient intake (i.e. above/below the 25<sup>th</sup> centile of intake in the population),  $w$  is the full adjustment set of confounders, and  $d$  is an individual CHD phenotype.  $\beta_d$  is the vector of regression coefficients for the NO<sub>2</sub>-methyl intake exposure variables and CHD phenotype, and  $\gamma_d$  corresponds to the regression coefficients for confounders and the CHD phenotype. In this analysis,  $m$ , the total number of CHD phenotypes, was equal to 12.

$$\Pr(Y = d|x, w) = \frac{\exp(\alpha_d + x\beta_d + w\gamma_d)}{1 + \sum_{k=1}^m \exp(\alpha_k + x\beta_k + w\gamma_k)} \quad (1)$$

The second stage model is shown in Equation 2, and defines the relationships between the beta-coefficients obtained from the first-stage model ( $\beta$ ).

$$\beta_i = Z_i\pi + \delta_i \quad (2)$$

$Z$  is the design-matrix that contains the variables that describe the associations between the first-stage betas, while  $\pi$  is the vector of regression coefficients for the design-matrix

variables and  $\delta$  are independent, normal random variables with a mean of zero and a variance of  $\tau^2$ .  $\tau^2$ , the second-stage variance, represents the residual variation in the first-stage betas that is not described by the variables in the design-matrix. In this study, the design-matrix was an 84x21 matrix with columns corresponding to a variable for the intercept, three indicator variables for the level of NO<sub>2</sub> exposure, an indicator for low nutrient intake, eleven indicators for CHD phenotype and five indicators for the broader defect groupings. The 84 rows represent the beta coefficients from the first-stage model (i.e. betas for 7 indicator variables corresponding to the combinations of NO<sub>2</sub> exposure and methyl-nutrient intake for each of the 12 CHD phenotypes). As an illustrative example, the row in the design matrix that corresponds to the beta-coefficient for NO<sub>2</sub> exposure greater than the 90<sup>th</sup> centile, low nutrient intake and a perimembranous ventricular septal defect is shown in (3):

$$Z_i = \begin{bmatrix} 1 & 0 & 0 & 1 & 1 & 0 & 1 & 0 & 0 & 0 & 0 & 0 & 0 & 0 & 0 & 0 & 0 & 1 & 0 & 0 & 0 & 0 \\ \vdots & & & & & & & & & & & & & & & & & & & & & & \end{bmatrix} \quad (3)$$

Once the second-stage coefficients are obtained, they are used to calculate the values towards which the first-stage estimates will be shrunk. The magnitude of that shrinkage depends upon the precision of the first-stage beta estimate and the value of  $\tau^2$ .(2)

## REFERENCES

1. Stingone JA, Luben TJ, Daniels JL, et al. Maternal exposure to criteria air pollutants and congenital heart defects in offspring: results from the national birth defects prevention study. *Environmental health perspectives* 2014;122(8):863-872.
2. Greenland S. A semi-Bayes approach to the analysis of correlated multiple associations, with an application to an occupational cancer-mortality study. *Statistics in medicine* 1992;11(2):219-230.
3. Witte JS, Greenland S, Kim L-L. Software for Hierarchical Modeling of Epidemiologic Data. *Epidemiology* 1998;9(5):563-566.

**LEGEND**

- Low Nutrient < 25th centile
- High Nutrient 25th centile and greater

// Indicates truncation of confidence interval

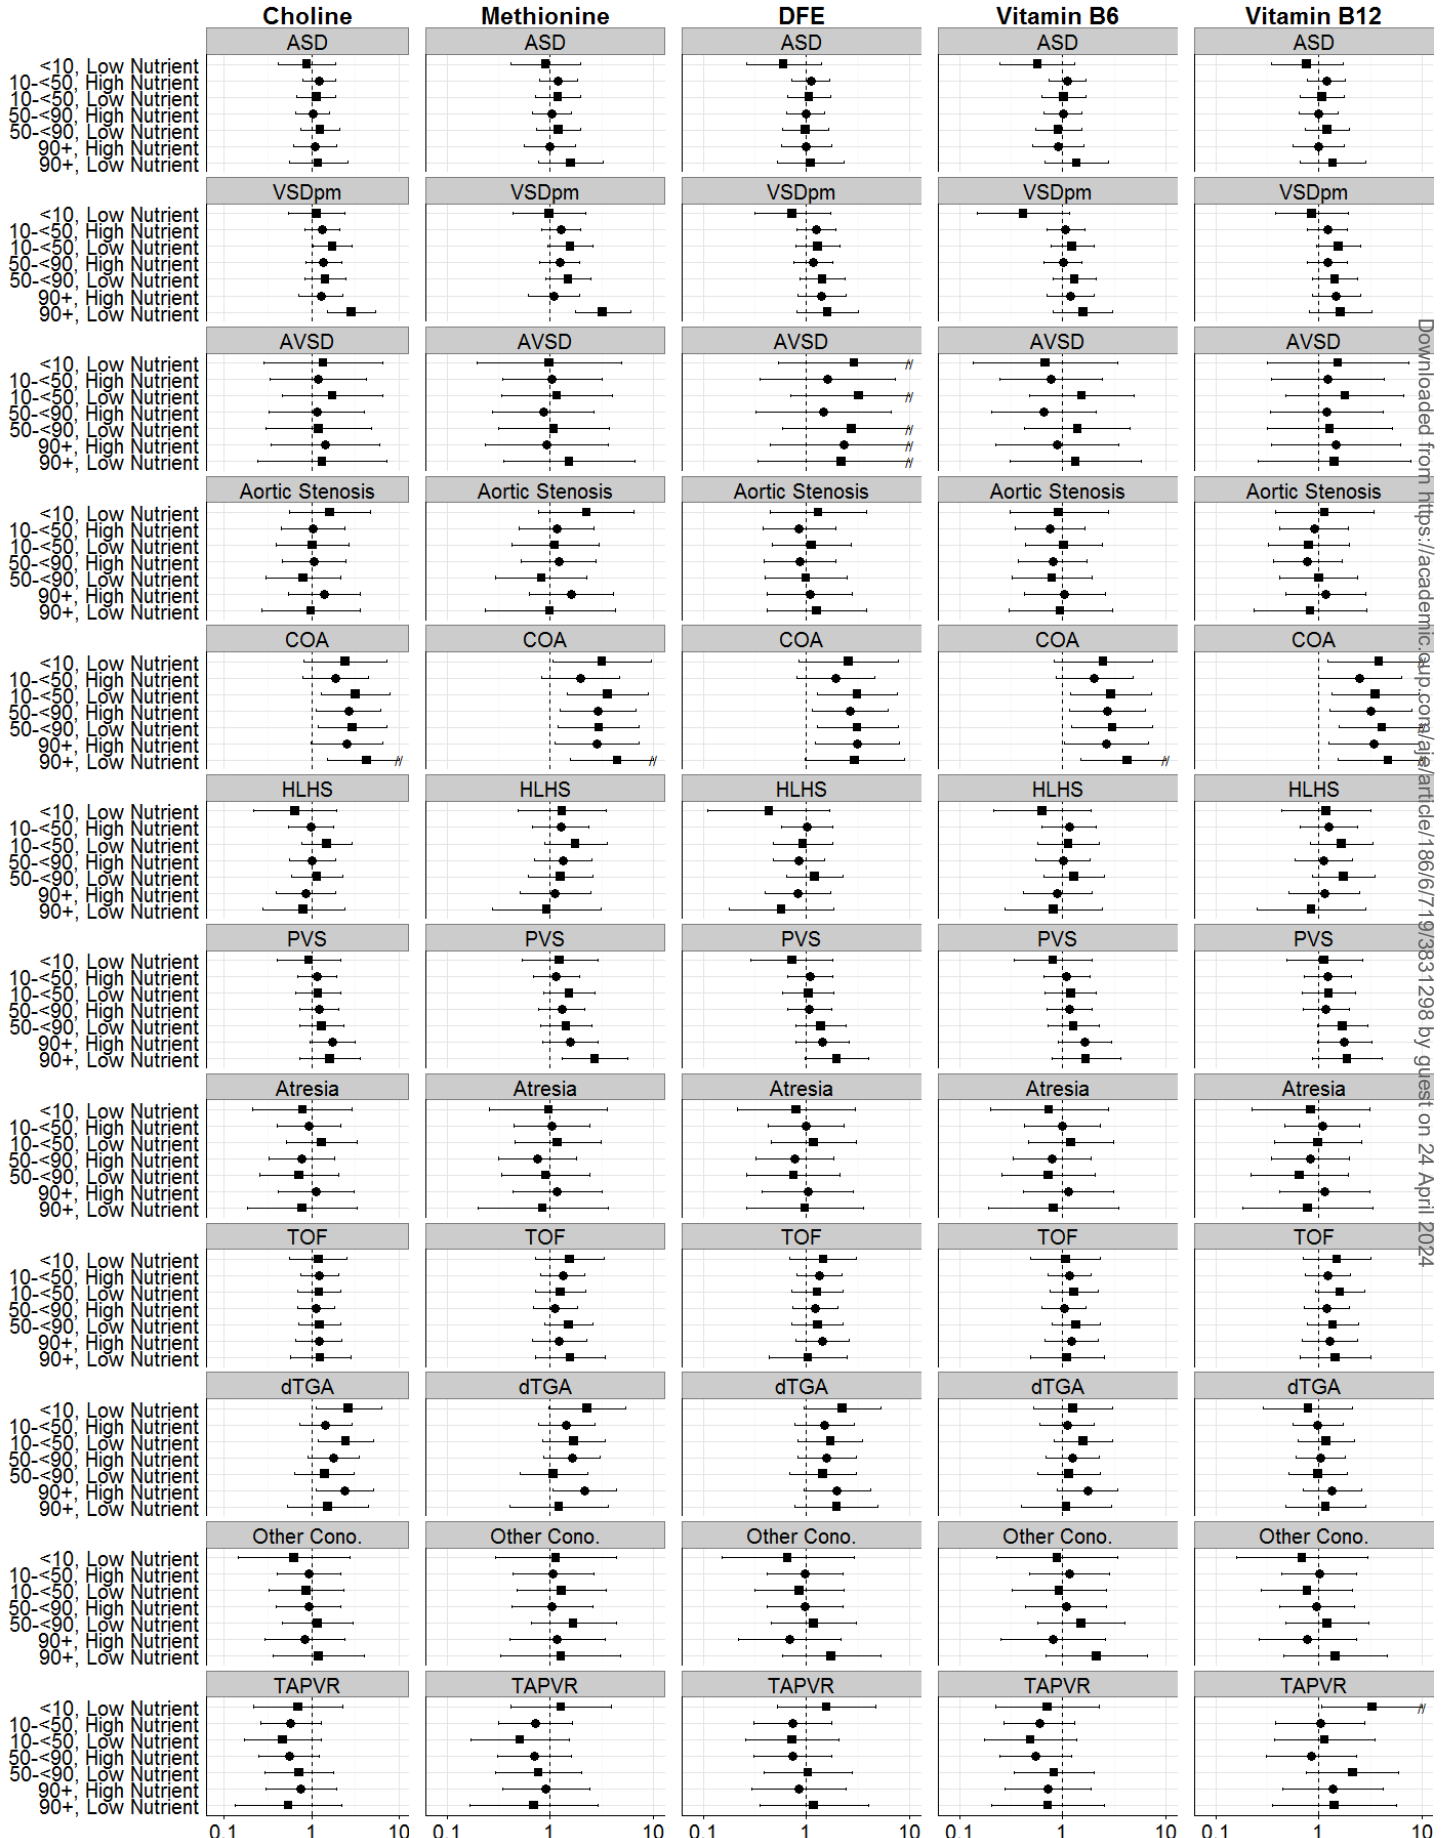

**Web Figure 1:** Estimated adjusted odds ratios and 95% confidence intervals between congenital heart defects and categories of nitrogen dioxide (NO<sub>2</sub>) exposure and dietary intake of methyl nutrients, National Birth Defects Prevention Study 1997-2006. Referent group for all comparisons is NO<sub>2</sub> exposure less than the 10<sup>th</sup> centile and nutrient intake at or greater than the 25<sup>th</sup> centile (high nutrient). Models adjusted for maternal race/ethnicity, age, education, household income, tobacco and alcohol use during pregnancy, use of folic-acid supplements one month prior to conception and site-specific ratio of septal cases to total congenital heart defect cases. Abbreviations: ASD-atrial septal defect; AVSD-atrioventricular septal defect; COA-coarctation of the aorta; DFE-dietary folate equivalents; dTGA-d-transposition of the great arteries; HLHS-hypoplastic left heart syndrome; Other Cono.-other conotruncal defects; PVS-pulmonary valve stenosis; TAPVR-total anomalous pulmonary venous return; TOF-tetralogy of Fallot; VSDpm-perimembranous ventricular septal defect.

**Web Table 1:** Adjusted<sup>a</sup> Odds Ratios (OR) and 95% Confidence Intervals (CI) between Congenital Heart Defects and Categories of NO<sub>2</sub> Exposure and Dietary Intake of Methyl Nutrients, National Birth Defects Prevention Study 1997-2006.

| Defect                 | Nutrient               | Ref <sup>b</sup> | <10 <sup>th</sup> centile NO <sub>2</sub> , Low Nutrient |           | 10-<50 <sup>th</sup> centile NO <sub>2</sub> , High Nutrient |           | 10-<50 <sup>th</sup> centile NO <sub>2</sub> , Low Nutrient |           | 50-<90 <sup>th</sup> centile NO <sub>2</sub> , High Nutrient |           | 50-<90 <sup>th</sup> centile NO <sub>2</sub> , Low Nutrient |           | ≥90 <sup>th</sup> centile NO <sub>2</sub> , High Nutrient |           | ≥90 <sup>th</sup> centile NO <sub>2</sub> , Low Nutrient |           |
|------------------------|------------------------|------------------|----------------------------------------------------------|-----------|--------------------------------------------------------------|-----------|-------------------------------------------------------------|-----------|--------------------------------------------------------------|-----------|-------------------------------------------------------------|-----------|-----------------------------------------------------------|-----------|----------------------------------------------------------|-----------|
|                        |                        |                  | OR                                                       | CI        | OR                                                           | CI        | OR                                                          | CI        | OR                                                           | CI        | OR                                                          | CI        | OR                                                        | CI        | OR                                                       | CI        |
| <b>ASD</b>             |                        |                  |                                                          |           |                                                              |           |                                                             |           |                                                              |           |                                                             |           |                                                           |           |                                                          |           |
|                        | Choline                | 1                | 0.88                                                     | 0.42,1.87 | 1.22                                                         | 0.79,1.88 | 1.14                                                        | 0.68,1.89 | 1.03                                                         | 0.66,1.61 | 1.25                                                        | 0.75,2.08 | 1.11                                                      | 0.63,1.95 | 1.20                                                     | 0.55,2.60 |
|                        | Methionine             | 1                | 0.91                                                     | 0.42,1.98 | 1.20                                                         | 0.78,1.84 | 1.19                                                        | 0.72,1.96 | 1.04                                                         | 0.67,1.61 | 1.21                                                        | 0.73,1.99 | 1.00                                                      | 0.56,1.76 | 1.59                                                     | 0.77,3.28 |
|                        | DFE                    | 1                | 0.60                                                     | 0.26,1.39 | 1.10                                                         | 0.72,1.67 | 1.06                                                        | 0.65,1.73 | 0.99                                                         | 0.65,1.51 | 0.99                                                        | 0.59,1.64 | 1.00                                                      | 0.57,1.75 | 1.10                                                     | 0.52,2.30 |
|                        | Vitamin B <sub>6</sub> | 1                | 0.57                                                     | 0.25,1.32 | 1.11                                                         | 0.73,1.69 | 1.03                                                        | 0.63,1.68 | 1.01                                                         | 0.66,1.55 | 0.91                                                        | 0.55,1.52 | 0.90                                                      | 0.51,1.60 | 1.37                                                     | 0.68,2.77 |
|                        | VitaminB <sub>12</sub> | 1                | 0.77                                                     | 0.34,1.71 | 1.18                                                         | 0.77,1.81 | 1.08                                                        | 0.65,1.77 | 0.99                                                         | 0.64,1.53 | 1.21                                                        | 0.74,1.99 | 0.99                                                      | 0.56,1.75 | 1.37                                                     | 0.66,2.82 |
| <b>VSDpm</b>           |                        |                  |                                                          |           |                                                              |           |                                                             |           |                                                              |           |                                                             |           |                                                           |           |                                                          |           |
|                        | Choline                | 1                | 1.14                                                     | 0.54,2.41 | 1.33                                                         | 0.83,2.12 | 1.73                                                        | 1.03,2.89 | 1.37                                                         | 0.86,2.19 | 1.43                                                        | 0.84,2.44 | 1.28                                                      | 0.72,2.29 | 2.86                                                     | 1.50,5.45 |
|                        | Methionine             | 1                | 0.98                                                     | 0.44,2.22 | 1.28                                                         | 0.82,1.99 | 1.56                                                        | 0.95,2.57 | 1.24                                                         | 0.80,1.94 | 1.49                                                        | 0.91,2.45 | 1.10                                                      | 0.62,1.94 | 3.23                                                     | 1.74,6.01 |
|                        | DFE                    | 1                | 0.73                                                     | 0.32,1.70 | 1.25                                                         | 0.80,1.93 | 1.30                                                        | 0.79,2.13 | 1.16                                                         | 0.75,1.80 | 1.43                                                        | 0.87,2.36 | 1.41                                                      | 0.82,2.41 | 1.60                                                     | 0.81,3.17 |
|                        | Vitamin B <sub>6</sub> | 1                | 0.42                                                     | 0.15,1.16 | 1.07                                                         | 0.70,1.63 | 1.24                                                        | 0.77,2.00 | 1.01                                                         | 0.66,1.54 | 1.30                                                        | 0.81,2.10 | 1.19                                                      | 0.70,2.01 | 1.58                                                     | 0.82,3.05 |
|                        | VitaminB <sub>12</sub> | 1                | 0.85                                                     | 0.38,1.93 | 1.22                                                         | 0.78,1.9  | 1.55                                                        | 0.95,2.54 | 1.21                                                         | 0.78,1.90 | 1.43                                                        | 0.86,2.36 | 1.47                                                      | 0.86,2.52 | 1.62                                                     | 0.80,3.26 |
| <b>AVSD</b>            |                        |                  |                                                          |           |                                                              |           |                                                             |           |                                                              |           |                                                             |           |                                                           |           |                                                          |           |
|                        | Choline                | 1                | 1.36                                                     | 0.28,6.57 | 1.19                                                         | 0.34,4.18 | 1.74                                                        | 0.47,6.48 | 1.15                                                         | 0.33,4.04 | 1.20                                                        | 0.30,4.81 | 1.43                                                      | 0.34,6.01 | 1.32                                                     | 0.24,7.22 |
|                        | Methionine             | 1                | 0.98                                                     | 0.19,4.91 | 1.05                                                         | 0.35,3.17 | 1.16                                                        | 0.34,3.97 | 0.86                                                         | 0.28,2.65 | 1.08                                                        | 0.32,3.72 | 0.92                                                      | 0.23,3.64 | 1.54                                                     | 0.36,6.65 |
|                        | DFE                    | 1                | 2.91                                                     | 0.54,15.8 | 1.61                                                         | 0.36,7.26 | 3.23                                                        | 0.71,14.7 | 1.47                                                         | 0.32,6.63 | 2.75                                                        | 0.59,12.9 | 2.30                                                      | 0.45,11.9 | 2.19                                                     | 0.34,14.2 |
|                        | Vitamin B <sub>6</sub> | 1                | 0.68                                                     | 0.14,3.43 | 0.78                                                         | 0.25,2.44 | 1.53                                                        | 0.48,4.88 | 0.66                                                         | 0.21,2.10 | 1.39                                                        | 0.43,4.50 | 0.90                                                      | 0.23,3.53 | 1.34                                                     | 0.31,5.78 |
|                        | VitaminB <sub>12</sub> | 1                | 1.53                                                     | 0.32,7.38 | 1.23                                                         | 0.35,4.32 | 1.80                                                        | 0.48,6.69 | 1.19                                                         | 0.34,4.18 | 1.28                                                        | 0.32,5.12 | 1.46                                                      | 0.35,6.13 | 1.41                                                     | 0.26,7.71 |
| <b>Aortic Stenosis</b> |                        |                  |                                                          |           |                                                              |           |                                                             |           |                                                              |           |                                                             |           |                                                           |           |                                                          |           |
|                        | Choline                | 1                | 1.62                                                     | 0.56,4.68 | 1.05                                                         | 0.45,2.43 | 1.02                                                        | 0.39,2.67 | 1.07                                                         | 0.46,2.47 | 0.81                                                        | 0.30,2.18 | 1.39                                                      | 0.54,3.62 | 0.98                                                     | 0.27,3.60 |
|                        | Methionine             | 1                | 2.26                                                     | 0.78,6.54 | 1.16                                                         | 0.50,2.68 | 1.12                                                        | 0.42,2.96 | 1.21                                                         | 0.53,2.78 | 0.82                                                        | 0.30,2.28 | 1.61                                                      | 0.63,4.13 | 0.99                                                     | 0.23,4.24 |
|                        | DFE                    | 1                | 1.31                                                     | 0.45,3.80 | 0.85                                                         | 0.38,1.91 | 1.13                                                        | 0.47,2.73 | 0.86                                                         | 0.39,1.91 | 1.00                                                        | 0.40,2.47 | 1.08                                                      | 0.42,2.79 | 1.26                                                     | 0.41,3.82 |
|                        | Vitamin B <sub>6</sub> | 1                | 0.92                                                     | 0.31,2.75 | 0.75                                                         | 0.35,1.63 | 1.03                                                        | 0.44,2.40 | 0.80                                                         | 0.37,1.72 | 0.79                                                        | 0.32,1.94 | 1.04                                                      | 0.42,2.57 | 0.95                                                     | 0.30,3.02 |
|                        | VitaminB <sub>12</sub> | 1                | 1.14                                                     | 0.38,3.40 | 0.90                                                         | 0.42,1.93 | 0.80                                                        | 0.32,1.98 | 0.77                                                         | 0.36,1.67 | 1.00                                                        | 0.42,2.38 | 1.16                                                      | 0.48,2.81 | 0.83                                                     | 0.24,2.90 |
| <b>COA</b>             |                        |                  |                                                          |           |                                                              |           |                                                             |           |                                                              |           |                                                             |           |                                                           |           |                                                          |           |
|                        | Choline                | 1                | 2.44                                                     | 0.81,7.35 | 1.88                                                         | 0.79,4.45 | 3.17                                                        | 1.29,7.80 | 2.65                                                         | 1.14,6.19 | 2.94                                                        | 1.19,7.25 | 2.55                                                      | 0.99,6.58 | 4.28                                                     | 1.52,12.0 |
|                        | Methionine             | 1                | 3.18                                                     | 1.06,9.59 | 1.97                                                         | 0.83,4.66 | 3.61                                                        | 1.47,8.85 | 2.92                                                         | 1.25,6.80 | 2.96                                                        | 1.20,7.33 | 2.83                                                      | 1.11,7.26 | 4.50                                                     | 1.57,12.9 |
|                        | DFE                    | 1                | 2.57                                                     | 0.85,7.72 | 1.93                                                         | 0.81,4.57 | 3.13                                                        | 1.28,7.66 | 2.67                                                         | 1.15,6.24 | 3.12                                                        | 1.27,7.71 | 3.11                                                      | 1.23,7.89 | 2.94                                                     | 0.98,8.82 |
|                        | Vitamin B <sub>6</sub> | 1                | 2.49                                                     | 0.83,7.50 | 2.03                                                         | 0.86,4.80 | 2.93                                                        | 1.18,7.24 | 2.71                                                         | 1.16,6.33 | 3.04                                                        | 1.23,7.51 | 2.66                                                      | 1.03,6.84 | 4.24                                                     | 1.51,11.9 |
|                        | VitaminB <sub>12</sub> | 1                | 3.81                                                     | 1.23,11.8 | 2.50                                                         | 0.98,6.35 | 3.51                                                        | 1.33,9.30 | 3.18                                                         | 1.27,7.99 | 4.12                                                        | 1.57,10.8 | 3.41                                                      | 1.25,9.34 | 4.69                                                     | 1.54,14.2 |
| Defect                 | Nutrient               | Ref              | <10 <sup>th</sup> centile NO <sub>2</sub> , Low          |           | 10-<50 <sup>th</sup> centile NO <sub>2</sub> ,               |           | 10-<50 <sup>th</sup> centile NO <sub>2</sub> ,              |           | 50-<90 <sup>th</sup> centile NO <sub>2</sub> ,               |           | 50-<90 <sup>th</sup> centile NO <sub>2</sub> ,              |           | ≥90 <sup>th</sup> centile NO <sub>2</sub> , High          |           | ≥90 <sup>th</sup> centile NO <sub>2</sub> , Low          |           |

|             |                        |     | Nutrient                       |           | High Nutrient                           |           | Low Nutrient                           |           | High Nutrient                           |           | Low Nutrient                           |           | Nutrient                        |           | Nutrient                       |           |
|-------------|------------------------|-----|--------------------------------|-----------|-----------------------------------------|-----------|----------------------------------------|-----------|-----------------------------------------|-----------|----------------------------------------|-----------|---------------------------------|-----------|--------------------------------|-----------|
|             |                        |     | OR                             | CI        | OR                                      | CI        | OR                                     | CI        | OR                                      | CI        | OR                                     | CI        | OR                              | CI        | OR                             | CI        |
| HLHS        |                        |     |                                |           |                                         |           |                                        |           |                                         |           |                                        |           |                                 |           |                                |           |
|             | Choline                | 1   | 0.65                           | 0.22,1.93 | 0.99                                    | 0.54,1.80 | 1.50                                   | 0.78,2.90 | 1.02                                    | 0.56,1.86 | 1.15                                   | 0.58,2.28 | 0.86                            | 0.40,1.86 | 0.81                           | 0.27,2.38 |
|             | Methionine             | 1   | 1.30                           | 0.49,3.50 | 1.26                                    | 0.67,2.39 | 1.77                                   | 0.88,3.54 | 1.33                                    | 0.71,2.51 | 1.26                                   | 0.61,2.59 | 1.12                            | 0.51,2.47 | 0.93                           | 0.28,3.09 |
|             | DFE                    | 1   | 0.43                           | 0.11,1.69 | 1.02                                    | 0.58,1.80 | 0.92                                   | 0.48,1.79 | 0.84                                    | 0.48,1.50 | 1.20                                   | 0.64,2.27 | 0.83                            | 0.40,1.74 | 0.57                           | 0.18,1.85 |
|             | Vitamin B <sub>6</sub> | 1   | 0.63                           | 0.21,1.89 | 1.15                                    | 0.64,2.10 | 1.14                                   | 0.57,2.25 | 1.01                                    | 0.55,1.84 | 1.29                                   | 0.66,2.52 | 0.89                            | 0.41,1.93 | 0.82                           | 0.28,2.41 |
|             | VitaminB <sub>12</sub> | 1   | 1.18                           | 0.44,3.16 | 1.25                                    | 0.66,2.36 | 1.66                                   | 0.83,3.32 | 1.12                                    | 0.59,2.13 | 1.75                                   | 0.88,3.49 | 1.13                            | 0.51,2.49 | 0.85                           | 0.25,2.82 |
| PVS         |                        |     |                                |           |                                         |           |                                        |           |                                         |           |                                        |           |                                 |           |                                |           |
|             | Choline                | 1   | 0.94                           | 0.40,2.18 | 1.16                                    | 0.69,1.95 | 1.19                                   | 0.66,2.14 | 1.22                                    | 0.73,2.04 | 1.30                                   | 0.72,2.34 | 1.73                            | 0.95,3.17 | 1.62                           | 0.73,3.57 |
|             | Methionine             | 1   | 1.24                           | 0.53,2.88 | 1.15                                    | 0.68,1.94 | 1.53                                   | 0.86,2.73 | 1.29                                    | 0.77,2.17 | 1.44                                   | 0.81,2.56 | 1.57                            | 0.85,2.91 | 2.72                           | 1.31,5.65 |
|             | DFE                    | 1   | 0.73                           | 0.29,1.81 | 1.09                                    | 0.66,1.80 | 1.05                                   | 0.59,1.86 | 1.08                                    | 0.65,1.77 | 1.38                                   | 0.79,2.42 | 1.43                            | 0.79,2.61 | 1.97                           | 0.96,4.02 |
|             | Vitamin B <sub>6</sub> | 1   | 0.81                           | 0.34,1.93 | 1.10                                    | 0.66,1.83 | 1.20                                   | 0.68,2.13 | 1.17                                    | 0.71,1.95 | 1.28                                   | 0.72,2.28 | 1.64                            | 0.91,2.98 | 1.69                           | 0.78,3.63 |
|             | VitaminB <sub>12</sub> | 1   | 1.13                           | 0.48,2.63 | 1.22                                    | 0.73,2.06 | 1.25                                   | 0.69,2.25 | 1.17                                    | 0.70,1.97 | 1.71                                   | 0.97,3.01 | 1.77                            | 0.97,3.25 | 1.88                           | 0.87,4.07 |
| Atresia     |                        |     |                                |           |                                         |           |                                        |           |                                         |           |                                        |           |                                 |           |                                |           |
|             | Choline                | 1   | 0.79                           | 0.21,2.94 | 0.93                                    | 0.40,2.18 | 1.31                                   | 0.52,3.33 | 0.77                                    | 0.33,1.84 | 0.72                                   | 0.25,2.06 | 1.12                            | 0.41,3.05 | 0.78                           | 0.18,3.35 |
|             | Methionine             | 1   | 0.97                           | 0.26,3.59 | 1.05                                    | 0.45,2.43 | 1.18                                   | 0.46,3.08 | 0.75                                    | 0.31,1.80 | 0.91                                   | 0.34,2.45 | 1.18                            | 0.43,3.19 | 0.85                           | 0.20,3.63 |
|             | DFE                    | 1   | 0.80                           | 0.22,2.97 | 0.99                                    | 0.42,2.30 | 1.18                                   | 0.46,3.02 | 0.78                                    | 0.33,1.84 | 0.75                                   | 0.26,2.14 | 1.03                            | 0.37,2.86 | 0.98                           | 0.27,3.58 |
|             | Vitamin B <sub>6</sub> | 1   | 0.74                           | 0.20,2.75 | 0.99                                    | 0.43,2.30 | 1.20                                   | 0.47,3.09 | 0.79                                    | 0.33,1.88 | 0.73                                   | 0.26,2.08 | 1.14                            | 0.42,3.10 | 0.82                           | 0.19,3.50 |
|             | VitaminB <sub>12</sub> | 1   | 0.84                           | 0.23,3.12 | 1.08                                    | 0.47,2.50 | 0.98                                   | 0.37,2.59 | 0.83                                    | 0.35,1.95 | 0.65                                   | 0.22,1.92 | 1.14                            | 0.42,3.10 | 0.78                           | 0.18,3.33 |
| TOF         |                        |     |                                |           |                                         |           |                                        |           |                                         |           |                                        |           |                                 |           |                                |           |
|             | Choline                | 1   | 1.20                           | 0.56,2.56 | 1.23                                    | 0.76,2.01 | 1.22                                   | 0.70,2.14 | 1.12                                    | 0.68,1.83 | 1.23                                   | 0.70,2.16 | 1.21                            | 0.66,2.22 | 1.26                           | 0.57,2.81 |
|             | Methionine             | 1   | 1.55                           | 0.72,3.31 | 1.33                                    | 0.82,2.16 | 1.27                                   | 0.72,2.23 | 1.12                                    | 0.68,1.83 | 1.52                                   | 0.89,2.62 | 1.23                            | 0.67,2.25 | 1.58                           | 0.72,3.44 |
|             | DFE                    | 1   | 1.46                           | 0.69,3.08 | 1.33                                    | 0.81,2.20 | 1.28                                   | 0.72,2.25 | 1.21                                    | 0.74,2.00 | 1.29                                   | 0.73,2.28 | 1.43                            | 0.78,2.61 | 1.04                           | 0.44,2.47 |
|             | Vitamin B <sub>6</sub> | 1   | 1.07                           | 0.49,2.32 | 1.16                                    | 0.72,1.88 | 1.29                                   | 0.75,2.22 | 1.03                                    | 0.64,1.68 | 1.36                                   | 0.79,2.32 | 1.23                            | 0.68,2.21 | 1.10                           | 0.48,2.51 |
|             | VitaminB <sub>12</sub> | 1   | 1.51                           | 0.71,3.18 | 1.22                                    | 0.74,2.01 | 1.61                                   | 0.93,2.79 | 1.19                                    | 0.72,1.97 | 1.37                                   | 0.78,2.41 | 1.28                            | 0.69,2.36 | 1.44                           | 0.66,3.16 |
| dTGA        |                        |     |                                |           |                                         |           |                                        |           |                                         |           |                                        |           |                                 |           |                                |           |
|             | Choline                | 1   | 2.64                           | 1.11,6.29 | 1.44                                    | 0.73,2.87 | 2.46                                   | 1.19,5.10 | 1.78                                    | 0.90,3.51 | 1.41                                   | 0.64,3.08 | 2.40                            | 1.13,5.13 | 1.55                           | 0.53,4.47 |
|             | Methionine             | 1   | 2.29                           | 0.96,5.43 | 1.44                                    | 0.76,2.71 | 1.70                                   | 0.84,3.45 | 1.64                                    | 0.87,3.06 | 1.08                                   | 0.51,2.30 | 2.16                            | 1.06,4.38 | 1.23                           | 0.41,3.69 |
|             | DFE                    | 1   | 2.24                           | 0.95,5.29 | 1.50                                    | 0.78,2.90 | 1.71                                   | 0.83,3.52 | 1.57                                    | 0.82,3.02 | 1.45                                   | 0.69,3.05 | 1.99                            | 0.94,4.18 | 1.96                           | 0.78,4.94 |
|             | Vitamin B <sub>6</sub> | 1   | 1.26                           | 0.52,3.06 | 1.10                                    | 0.61,2.01 | 1.58                                   | 0.82,3.04 | 1.24                                    | 0.68,2.24 | 1.15                                   | 0.58,2.30 | 1.75                            | 0.89,3.45 | 1.09                           | 0.4,2.98  |
|             | VitaminB <sub>12</sub> | 1   | 0.79                           | 0.29,2.12 | 0.98                                    | 0.56,1.71 | 1.18                                   | 0.63,2.20 | 1.03                                    | 0.60,1.79 | 0.98                                   | 0.51,1.88 | 1.35                            | 0.70,2.59 | 1.16                           | 0.48,2.82 |
| Other Cono. |                        |     |                                |           |                                         |           |                                        |           |                                         |           |                                        |           |                                 |           |                                |           |
|             | Choline                | 1   | 0.63                           | 0.15,2.74 | 0.92                                    | 0.40,2.14 | 0.87                                   | 0.32,2.36 | 0.92                                    | 0.40,2.14 | 1.17                                   | 0.46,2.98 | 0.84                            | 0.30,2.41 | 1.21                           | 0.36,4.06 |
|             | Methionine             | 1   | 1.15                           | 0.30,4.40 | 1.07                                    | 0.44,2.63 | 1.29                                   | 0.47,3.51 | 1.05                                    | 0.43,2.58 | 1.69                                   | 0.65,4.36 | 1.17                            | 0.40,3.40 | 1.27                           | 0.33,4.83 |
|             | DFE                    | 1   | 0.66                           | 0.15,2.88 | 0.97                                    | 0.42,2.25 | 0.86                                   | 0.32,2.31 | 0.97                                    | 0.42,2.24 | 1.18                                   | 0.46,3.03 | 0.69                            | 0.22,2.14 | 1.74                           | 0.58,5.23 |
|             | Vitamin B <sub>6</sub> | 1   | 0.89                           | 0.23,3.40 | 1.17                                    | 0.48,2.84 | 0.93                                   | 0.32,2.67 | 1.08                                    | 0.44,2.63 | 1.52                                   | 0.58,4.00 | 0.81                            | 0.25,2.60 | 2.14                           | 0.68,6.67 |
| Defect      | Nutrient               | Ref | <10 <sup>th</sup> centile      |           | 10-<50 <sup>th</sup> centile            |           | 10-<50 <sup>th</sup> centile           |           | 50-<90 <sup>th</sup> centile            |           | 50-<90 <sup>th</sup> centile           |           | ≥90 <sup>th</sup> centile       |           | ≥90 <sup>th</sup> centile      |           |
|             |                        |     | NO <sub>2</sub> , Low Nutrient |           | centile NO <sub>2</sub> , High Nutrient |           | centile NO <sub>2</sub> , Low Nutrient |           | centile NO <sub>2</sub> , High Nutrient |           | centile NO <sub>2</sub> , Low Nutrient |           | NO <sub>2</sub> , High Nutrient |           | NO <sub>2</sub> , Low Nutrient |           |
|             |                        |     | OR                             | CI        | OR                                      | CI        | OR                                     | CI        | OR                                      | CI        | OR                                     | CI        | OR                              | CI        | OR                             | CI        |

|       |                        |   |      |           |      |           |      |           |      |           |      |           |      |           |      |           |
|-------|------------------------|---|------|-----------|------|-----------|------|-----------|------|-----------|------|-----------|------|-----------|------|-----------|
| TAPVR | VitaminB <sub>12</sub> | 1 | 0.69 | 0.16,2.99 | 1.01 | 0.44,2.32 | 0.77 | 0.28,2.12 | 0.95 | 0.41,2.21 | 1.21 | 0.48,3.06 | 0.78 | 0.26,2.31 | 1.45 | 0.46,4.57 |
|       | Choline                | 1 | 0.70 | 0.22,2.25 | 0.58 | 0.26,1.27 | 0.47 | 0.17,1.30 | 0.55 | 0.25,1.22 | 0.72 | 0.29,1.80 | 0.76 | 0.30,1.94 | 0.54 | 0.13,2.23 |
|       | Methionine             | 1 | 1.27 | 0.42,3.89 | 0.72 | 0.32,1.63 | 0.51 | 0.17,1.53 | 0.7  | 0.31,1.60 | 0.77 | 0.30,2.01 | 0.91 | 0.35,2.40 | 0.69 | 0.17,2.90 |
|       | DFE                    | 1 | 1.56 | 0.52,4.69 | 0.74 | 0.31,1.77 | 0.73 | 0.26,2.06 | 0.74 | 0.31,1.75 | 1.04 | 0.39,2.76 | 0.85 | 0.30,2.44 | 1.19 | 0.35,3.96 |
|       | Vitamin B <sub>6</sub> | 1 | 0.71 | 0.22,2.28 | 0.60 | 0.27,1.32 | 0.49 | 0.18,1.36 | 0.55 | 0.25,1.21 | 0.83 | 0.34,2.02 | 0.72 | 0.28,1.88 | 0.72 | 0.21,2.52 |
|       | VitaminB <sub>12</sub> | 1 | 3.30 | 1.06,10.3 | 1.04 | 0.38,2.79 | 1.14 | 0.37,3.49 | 0.85 | 0.31,2.32 | 2.12 | 0.76,5.93 | 1.37 | 0.45,4.23 | 1.41 | 0.36,5.64 |

Abbreviations: ASD-atrial septal defect; AVSD-atrioventricular septal defect; COA-coarctation of the aorta; DFE-dietary folate equivalents; dTGA-d-transposition of the great arteries; HLHS-hypoplastic left heart syndrome; NO<sub>2</sub>-nitrogen dioxide; Other Cono.-other conotruncals; PVS-pulmonary valve stenosis; TAPVR-total anomalous pulmonary venous return; TOF-tetralogy of Fallot; VSDpm-perimembranous ventricular septal defect.

<sup>a</sup> Models adjusted for maternal race/ethnicity, age, education, household income, tobacco and alcohol use during pregnancy, use of folic acid supplements one month prior to conception and site-specific ratio of septal cases to total congenital heart defect cases.

<sup>b</sup>Referent group for all comparisons is NO<sub>2</sub> exposure less than the 10<sup>th</sup> centile and nutrient intake at or greater than the 25<sup>th</sup> centile (high nutrient).



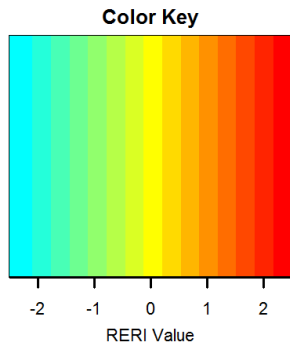

|             |                     |                     |                     |                     |                     |                    |
|-------------|---------------------|---------------------|---------------------|---------------------|---------------------|--------------------|
|             | 0.68 [-0.53, 1.89]  | 0.20 [-0.90, 1.30]  | 0.49 [-0.43, 1.42]  | 0.9 [-0.08, 1.87]   | 0.61 [-0.46, 1.68]  | ASD                |
|             | 2.15 [0.39, 3.92]   | 1.43 [-0.18, 3.04]  | 0.47 [-0.69, 1.62]  | 0.97 [-0.04, 1.98]  | 0.29 [-0.94, 1.52]  | VSD <sub>pm</sub>  |
|             | 0.64 [-1.5, 2.78]   | -0.47 [-3.39, 2.45] | -2.02 [-4, 3.89]    | 0.76 [-1.02, 2.54]  | -0.58 [-3.72, 2.56] | AVSD               |
|             | -1.87 [-4, 1.22]    | -1.03 [-3.34, 1.28] | -0.14 [-1.92, 1.65] | -0.01 [-1.49, 1.46] | -0.47 [-2.21, 1.26] | Aortic Stenosis    |
|             | -0.51 [-4, 3.66]    | 0.29 [-3.20, 3.77]  | -1.74 [-4, 2.12]    | 0.09 [-3.44, 3.62]  | -1.53 [-4, 3.35]    | COA                |
|             | -0.5 [-2.23, 1.24]  | 0.30 [-0.81, 1.41]  | 0.31 [-0.65, 1.27]  | 0.29 [-0.83, 1.41]  | -0.46 [-2.08, 1.16] | HLHS               |
|             | 0.91 [-0.92, 2.74]  | -0.05 [-1.5, 1.39]  | 0.81 [-0.53, 2.14]  | 0.24 [-1.13, 1.6]   | -0.02 [-1.62, 1.57] | PVS                |
|             | -0.29 [-2.16, 1.57] | -0.13 [-1.78, 1.52] | 0.14 [-1.45, 1.73]  | -0.06 [-1.69, 1.56] | -0.2 [-1.91, 1.5]   | Atresia            |
|             | -0.2 [-1.74, 1.35]  | -0.16 [-1.46, 1.15] | -0.85 [-2.37, 0.66] | -0.2 [-1.43, 1.04]  | -0.34 [-1.83, 1.15] | TOF                |
|             | -2.22 [-4, 0.53]    | -2.5 [-4, 0.64]     | -1.26 [-3.75, 1.23] | -0.92 [-2.69, 0.85] | 0.03 [-1.27, 1.32]  | dTGA               |
|             | -0.05 [-2.14, 2.04] | 0.74 [-0.73, 2.21]  | 1.39 [-0.29, 3.08]  | 1.44 [-0.58, 3.47]  | 0.98 [-0.59, 2.56]  | Other Conotruncals |
|             | -0.49 [-2.29, 1.31] | 0.08 [-1.11, 1.28]  | -0.23 [-2.19, 1.73] | 0.29 [-0.9, 1.47]   | -2.26 [-4, 1.81]    | TAPVR              |
| Methionine  |                     |                     |                     |                     |                     |                    |
| Choline     |                     |                     |                     |                     |                     |                    |
| DFE         |                     |                     |                     |                     |                     |                    |
| Vitamin.B6  |                     |                     |                     |                     |                     |                    |
| Vitamin.B12 |                     |                     |                     |                     |                     |                    |

**Web Figure 2:** Patterns in Relative Excess Risk due to Interaction (RERI) between maternal nitrogen dioxide (NO<sub>2</sub>) exposure and methyl nutrient intake, National Birth Defects Prevention Study, 1997-2006. RERIs calculated by comparing odds ratios of women with NO<sub>2</sub> exposure  $\geq 90^{\text{th}}$  centile and nutrient  $< 25^{\text{th}}$  centile, women with NO<sub>2</sub> exposure  $\geq 90^{\text{th}}$  centile and nutrient intake  $\geq 25^{\text{th}}$  centile and women with NO<sub>2</sub> exposure  $< 10^{\text{th}}$  centile and nutrient intake  $< 25^{\text{th}}$  centile (referent: women with NO<sub>2</sub> exposure  $< 10^{\text{th}}$  centile and nutrient intake  $\geq 25^{\text{th}}$  centile). The color gradient extends from red indicating more than additive interaction to blue which indicates less than additive interaction, with yellow indicating no departure from additivity.

Abbreviations: ASD-atrial septal defect, AVSD-atrioventricular septal defect, COA-coarctation of the aorta, DFE-dietary folate equivalents, dTGA-d-transposition of the great arteries, HLHS-hypoplastic left heart syndrome, PVS-pulmonary valve stenosis, TAPVR-total anomalous pulmonary venous return, TOF-tetralogy of Fallot, VSD<sub>pm</sub>-perimembranous ventricular septal defect

**Web Table 2:** Adjusted<sup>a</sup> Odds Ratios (OR) and 95% Confidence Intervals (CI) between Congenital Heart Defects and Categories of NO<sub>2</sub> Exposure and Dietary Intake of Methionine, Stratified by Use of a Folic-Acid Supplement, National Birth Defects Prevention Study 1997-2006.

| Defect          | Use of a Folic-Acid Supplement <sup>b</sup> | Ref <sup>c</sup> <10 <sup>th</sup> centile NO <sub>2</sub> , Low Methionine |      | 10-<50 <sup>th</sup> centile NO <sub>2</sub> , High Methionine |      | 10-<50 <sup>th</sup> centile NO <sub>2</sub> , Low Methionine |      | 50-<90 <sup>th</sup> centile NO <sub>2</sub> , High Methionine |      | 50-<90 <sup>th</sup> centile NO <sub>2</sub> , Low Methionine |      | ≥90 <sup>th</sup> centile NO <sub>2</sub> , High Methionine |      | ≥90 <sup>th</sup> centile NO <sub>2</sub> , Low Methionine |                 |            |
|-----------------|---------------------------------------------|-----------------------------------------------------------------------------|------|----------------------------------------------------------------|------|---------------------------------------------------------------|------|----------------------------------------------------------------|------|---------------------------------------------------------------|------|-------------------------------------------------------------|------|------------------------------------------------------------|-----------------|------------|
|                 |                                             | OR                                                                          | OR   | CI                                                             | OR   | CI                                                            | OR   | CI                                                             | OR   | CI                                                            | OR   | CI                                                          | OR   | CI                                                         | OR              | CI         |
| ASD             |                                             |                                                                             |      |                                                                |      |                                                               |      |                                                                |      |                                                               |      |                                                             |      |                                                            |                 |            |
|                 | Supplement Use                              | 1                                                                           | 2.06 | 0.35,12.0                                                      | 2.49 | 0.86,7.20                                                     | 2.04 | 0.62,6.67                                                      | 1.74 | 0.60,5.10                                                     | 2.44 | 0.77,7.73                                                   | 2.34 | 0.67,8.23                                                  | 8.30            | 2.19,31.52 |
|                 | No Use of Supplements                       | 1                                                                           | 0.61 | 0.24,1.59                                                      | 0.95 | 0.59,1.53                                                     | 1.00 | 0.56,1.77                                                      | 0.90 | 0.55,1.47                                                     | 0.93 | 0.52,1.66                                                   | 0.71 | 0.36,1.40                                                  | 0.55            | 0.16,1.92  |
| VSDpm           |                                             |                                                                             |      |                                                                |      |                                                               |      |                                                                |      |                                                               |      |                                                             |      |                                                            |                 |            |
|                 | Supplement Use                              | 1                                                                           | 1.05 | 0.28,3.98                                                      | 0.91 | 0.47,1.77                                                     | 1.56 | 0.75,3.23                                                      | 0.78 | 0.40,1.53                                                     | 1.33 | 0.63,2.81                                                   | 0.77 | 0.30,1.98                                                  | 2.55            | 0.90,7.20  |
|                 | No Use of Supplements                       | 1                                                                           | 0.82 | 0.25,2.61                                                      | 1.64 | 0.89,3.02                                                     | 1.60 | 0.80,3.20                                                      | 1.73 | 0.94,3.19                                                     | 1.66 | 0.83,3.30                                                   | 1.36 | 0.64,2.90                                                  | 4.23            | 1.85,9.67  |
| Aortic Stenosis |                                             |                                                                             |      |                                                                |      |                                                               |      |                                                                |      |                                                               |      |                                                             |      |                                                            |                 |            |
|                 | Supplement Use                              | 1                                                                           | 1.82 | 0.31,10.6                                                      | 0.92 | 0.29,2.90                                                     | 0.41 | 0.07,2.29                                                      | 0.71 | 0.22,2.28                                                     | 1.02 | 0.27,3.78                                                   | 1.11 | 0.26,4.75                                                  | 1.05            | 0.11,10.1  |
|                 | No Use of Supplements                       | 1                                                                           | 3.95 | 0.85,18.4                                                      | 1.47 | 0.42,5.18                                                     | 1.95 | 0.49,7.72                                                      | 1.94 | 0.56,6.66                                                     | 0.25 | 0.03,2.48                                                   | 2.39 | 0.61,9.34                                                  | NE <sup>d</sup> |            |
| COA             |                                             |                                                                             |      |                                                                |      |                                                               |      |                                                                |      |                                                               |      |                                                             |      |                                                            |                 |            |
|                 | Supplement Use                              | 1                                                                           | 3.56 | 0.67,18.8                                                      | 1.30 | 0.37,4.59                                                     | 3.47 | 0.95,12.58                                                     | 1.92 | 0.57,6.51                                                     | 1.66 | 0.43,6.48                                                   | 3.06 | 0.79,11.92                                                 | 2.38            | 0.37,15.3  |
|                 | No Use of Supplements                       | 1                                                                           | 2.91 | 0.57,14.9                                                      | 2.46 | 0.74,8.18                                                     | 3.78 | 1.07,13.42                                                     | 3.75 | 1.14,12.3                                                     | 4.23 | 1.21,14.82                                                  | 2.44 | 0.63,9.41                                                  | 7.1             | 1.70,29.7  |
| HLHS            |                                             |                                                                             |      |                                                                |      |                                                               |      |                                                                |      |                                                               |      |                                                             |      |                                                            |                 |            |
|                 | Supplement Use                              | 1                                                                           | 1.32 | 0.13,13.4                                                      | 1.40 | 0.40,4.92                                                     | 2.35 | 0.61,8.95                                                      | 2.08 | 0.62,7.03                                                     | 1.56 | 0.39,6.25                                                   | 1.92 | 0.45,8.07                                                  | NE <sup>d</sup> |            |
|                 | No Use of Supplements                       | 1                                                                           | 1.23 | 0.36,4.18                                                      | 1.20 | 0.57,2.52                                                     | 1.61 | 0.70,3.69                                                      | 1.00 | 0.47,2.15                                                     | 1.15 | 0.48,2.74                                                   | 0.77 | 0.28,2.12                                                  | 0.75            | 0.16,3.63  |
| PVS             |                                             |                                                                             |      |                                                                |      |                                                               |      |                                                                |      |                                                               |      |                                                             |      |                                                            |                 |            |
|                 | Supplement Use                              | 1                                                                           | 1.79 | 0.42,7.67                                                      | 1.35 | 0.54,3.36                                                     | 1.98 | 0.73,5.37                                                      | 1.20 | 0.48,2.97                                                     | 1.47 | 0.54,4.04                                                   | 1.57 | 0.53,4.68                                                  | 2.57            | 0.66,10.0  |
|                 | No Use of Supplements                       | 1                                                                           | 0.86 | 0.27,2.75                                                      | 1.02 | 0.54,1.94                                                     | 1.36 | 0.66,2.79                                                      | 1.29 | 0.68,2.43                                                     | 1.38 | 0.67,2.82                                                   | 1.47 | 0.69,3.16                                                  | 2.89            | 1.15,7.26  |

| Defect      | Use of a Folic-Acid Supplement <sup>b</sup> | Ref <sup>c</sup> | <10 <sup>th</sup> centile NO <sub>2</sub> , Low Methionine |           | 10-<50 <sup>th</sup> centile NO <sub>2</sub> , High Methionine |           | 10-<50 <sup>th</sup> centile NO <sub>2</sub> , Low Methionine |           | 50-<90 <sup>th</sup> centile NO <sub>2</sub> , High Methionine |           | 50-<90 <sup>th</sup> centile NO <sub>2</sub> , Low Methionine |           | ≥90 <sup>th</sup> centile NO <sub>2</sub> , High Methionine |           | ≥90 <sup>th</sup> centile NO <sub>2</sub> , Low Methionine |           |
|-------------|---------------------------------------------|------------------|------------------------------------------------------------|-----------|----------------------------------------------------------------|-----------|---------------------------------------------------------------|-----------|----------------------------------------------------------------|-----------|---------------------------------------------------------------|-----------|-------------------------------------------------------------|-----------|------------------------------------------------------------|-----------|
|             |                                             |                  | OR                                                         | CI        | OR                                                             | CI        | OR                                                            | CI        | OR                                                             | CI        | OR                                                            | CI        | OR                                                          | CI        | OR                                                         | CI        |
| Atresia     |                                             |                  |                                                            |           |                                                                |           |                                                               |           |                                                                |           |                                                               |           |                                                             |           |                                                            |           |
|             | Supplement Use                              | 1                | 1.25                                                       | 0.12,12.7 | 1.31                                                           | 0.37,4.72 | 0.85                                                          | 0.17,4.36 | 0.39                                                           | 0.09,1.67 | 0.46                                                          | 0.08,2.88 | 0.82                                                        | 0.13,5.18 | NE <sup>d</sup>                                            |           |
|             | No Use of Supplements                       | 1                | 0.69                                                       | 0.07,6.33 | 0.87                                                           | 0.28,2.71 | 1.51                                                          | 0.43,5.28 | 1.04                                                           | 0.34,3.22 | 1.22                                                          | 0.34,4.44 | 1.48                                                        | 0.41,5.40 | 0.79                                                       | 0.09,7.31 |
| TOF         |                                             |                  |                                                            |           |                                                                |           |                                                               |           |                                                                |           |                                                               |           |                                                             |           |                                                            |           |
|             | Supplement Use                              | 1                | 1.07                                                       | 0.28,4.12 | 1.06                                                           | 0.54,2.10 | 0.96                                                          | 0.42,2.17 | 0.75                                                           | 0.37,1.50 | 1.23                                                          | 0.57,2.66 | 1.05                                                        | 0.42,2.65 | 0.73                                                       | 0.15,3.54 |
|             | No Use of Supplements                       | 1                | 2.30                                                       | 0.82,6.48 | 1.72                                                           | 0.83,3.53 | 1.66                                                          | 0.73,3.78 | 1.63                                                           | 0.79,3.39 | 1.96                                                          | 0.89,4.35 | 1.56                                                        | 0.66,3.69 | 2.58                                                       | 0.91,7.32 |
| dTGA        |                                             |                  |                                                            |           |                                                                |           |                                                               |           |                                                                |           |                                                               |           |                                                             |           |                                                            |           |
|             | Supplement Use                              | 1                | 2.82                                                       | 0.59,13.5 | 1.66                                                           | 0.56,4.92 | 2.10                                                          | 0.64,6.96 | 1.51                                                           | 0.51,4.42 | 1.2                                                           | 0.34,4.26 | 2.92                                                        | 0.88,9.68 | NE <sup>d</sup>                                            |           |
|             | No Use of Supplements                       | 1                | 2.28                                                       | 0.76,6.89 | 1.29                                                           | 0.59,2.83 | 1.51                                                          | 0.62,3.71 | 1.69                                                           | 0.78,3.67 | 0.90                                                          | 0.34,2.40 | 1.82                                                        | 0.74,4.47 | 1.41                                                       | 0.36,5.55 |
| Other Cono. |                                             |                  |                                                            |           |                                                                |           |                                                               |           |                                                                |           |                                                               |           |                                                             |           |                                                            |           |
|             | Supplement Use                              | 1                | NE <sup>d</sup>                                            |           | 2.14                                                           | 0.26,17.7 | 2.53                                                          | 0.26,25.0 | 2.06                                                           | 0.25,16.9 | 5.44                                                          | 0.64,45.9 | 2.60                                                        | 0.22,30.0 | 4.58                                                       | 0.27,77.9 |
|             | No Use of Supplements                       | 1                | 1.07                                                       | 0.20,5.70 | 0.88                                                           | 0.32,2.40 | 1.04                                                          | 0.32,3.35 | 0.90                                                           | 0.32,2.48 | 1.12                                                          | 0.36,3.50 | 0.91                                                        | 0.26,3.24 | 0.66                                                       | 0.07,5.83 |
| TAPVR       |                                             |                  |                                                            |           |                                                                |           |                                                               |           |                                                                |           |                                                               |           |                                                             |           |                                                            |           |
|             | Supplement Use                              | 1                | 2.06                                                       | 0.18,24.1 | 0.92                                                           | 0.19,4.54 | 0.40                                                          | 0.04,4.47 | 1.03                                                           | 0.22,4.88 | 1.37                                                          | 0.24,7.79 | 0.50                                                        | 0.04,5.85 | NE <sup>d</sup>                                            |           |
|             | No Use of Supplements                       | 1                | 1.59                                                       | 0.38,6.64 | 0.62                                                           | 0.23,1.64 | 0.40                                                          | 0.10,1.64 | 0.54                                                           | 0.20,1.49 | 0.55                                                          | 0.15,1.98 | 1.03                                                        | 0.33,3.19 | 0.54                                                       | 0.06,4.69 |

Abbreviations: ASD-atrial septal defect; AVSD-atrioventricular septal defect; COA-coarctation of the aorta; DFE-dietary folate equivalents; dTGA-d-transposition of the great arteries; HLHS-hypoplastic left heart syndrome; NO<sub>2</sub>-nitrogen dioxide; Other Cono.-other conotruncal defects; PVS-pulmonary valve stenosis; TAPVR-total anomalous pulmonary venous return; TOF-tetralogy of Fallot; VSDpm-perimembranous ventricular septal defect.

<sup>a</sup>Estimates result from first-stage logistic regression model, adjusted for maternal race/ethnicity, age, education, household income, tobacco and alcohol use during pregnancy, use of folic acid supplements one month prior to conception and site-specific ratio of septal cases to total congenital heart defect cases.

<sup>b</sup> Time period of exposure was month prior to conception

<sup>c</sup> Referent group for all comparisons is NO<sub>2</sub> exposure less than the 10<sup>th</sup> centile and methionine intake at or greater than the 25<sup>th</sup> centile.

<sup>d</sup>Non-estimable due to limited sample size

**Web Table 3:** Adjusted<sup>a</sup> Odds Ratios (OR) and 95% Confidence Intervals (CI) between Congenital Heart Defects and Categories of NO<sub>2</sub> Exposure and Combined Dietary Intake of All Nutrients, National Birth Defects Prevention Study 1997-2006.

| Defect   | Ref <sup>b</sup> | <10 <sup>th</sup> centile                      |           | 10-<50 <sup>th</sup>                    |           | 10-<50 <sup>th</sup>                                   |           | 50-<90 <sup>th</sup>                            |           | 50-<90 <sup>th</sup>                                   |           | ≥90 <sup>th</sup> centile                       |           | ≥90 <sup>th</sup> centile               |           |
|----------|------------------|------------------------------------------------|-----------|-----------------------------------------|-----------|--------------------------------------------------------|-----------|-------------------------------------------------|-----------|--------------------------------------------------------|-----------|-------------------------------------------------|-----------|-----------------------------------------|-----------|
|          |                  | NO <sub>2</sub> , Low in at least one Nutrient |           | NO <sub>2</sub> , High in all Nutrients |           | centile NO <sub>2</sub> , Low in at least one Nutrient |           | centile NO <sub>2</sub> , High in all Nutrients |           | centile NO <sub>2</sub> , Low in at least one Nutrient |           | centile NO <sub>2</sub> , High in all Nutrients |           | NO <sub>2</sub> , High in all Nutrients |           |
|          | OR               | OR                                             | CI        | OR                                      | CI        | OR                                                     | CI        | OR                                              | CI        | OR                                                     | CI        | OR                                              | CI        | OR                                      | CI        |
| ASD      | 1                | 0.72                                           | 0.36,1.44 | 1.09                                    | 0.67,1.80 | 1.06                                                   | 0.64,1.76 | 0.96                                            | 0.58,1.59 | 1.00                                                   | 0.60,1.67 | 0.91                                            | 0.47,1.79 | 1.14                                    | 0.57,2.27 |
| VSDpm    | 1                | 1.12                                           | 0.55,2.28 | 1.47                                    | 0.84,2.56 | 1.47                                                   | 0.84,2.58 | 1.30                                            | 0.74,2.28 | 1.58                                                   | 0.90,2.77 | 1.18                                            | 0.58,2.40 | 2.41                                    | 1.25,4.65 |
| AVSD     | 1                | 1.35                                           | 0.22,8.24 | 1.06                                    | 0.22,5.07 | 1.71                                                   | 0.38,7.73 | 1.08                                            | 0.23,5.11 | 1.25                                                   | 0.27,5.85 | 1.52                                            | 0.25,9.43 | 1.20                                    | 0.16,8.76 |
| Aortic   |                  |                                                |           |                                         |           |                                                        |           |                                                 |           |                                                        |           |                                                 |           |                                         |           |
| Stenosis | 1                | 2.15                                           | 0.65,7.15 | 1.30                                    | 0.43,3.89 | 1.26                                                   | 0.42,3.80 | 1.38                                            | 0.47,4.06 | 1.07                                                   | 0.35,3.24 | 1.80                                            | 0.53,6.16 | 1.32                                    | 0.34,5.07 |
| COA      | 1                | 2.03                                           | 0.60,6.88 | 1.93                                    | 0.67,5.55 | 2.80                                                   | 0.99,7.96 | 2.91                                            | 1.04,8.18 | 2.93                                                   | 1.03,8.28 | 2.80                                            | 0.88,8.89 | 3.73                                    | 1.18,11.7 |
| HLHS     | 1                | 0.56                                           | 0.20,1.56 | 0.99                                    | 0.50,1.97 | 1.06                                                   | 0.53,2.12 | 0.85                                            | 0.42,1.70 | 1.09                                                   | 0.55,2.17 | 0.70                                            | 0.28,1.80 | 0.75                                    | 0.28,1.99 |
| PVS      | 1                | 0.75                                           | 0.33,1.67 | 0.90                                    | 0.49,1.64 | 1.21                                                   | 0.67,2.18 | 1.02                                            | 0.56,1.84 | 1.24                                                   | 0.69,2.23 | 1.38                                            | 0.68,2.83 | 1.81                                    | 0.89,3.69 |
| Atresia  | 1                | 0.54                                           | 0.13,2.19 | 0.88                                    | 0.35,2.24 | 0.86                                                   | 0.33,2.23 | 0.65                                            | 0.25,1.71 | 0.58                                                   | 0.21,1.59 | 1.19                                            | 0.39,3.63 | 0.42                                    | 0.08,2.11 |
| TOF      | 1                | 1.68                                           | 0.79,3.57 | 1.52                                    | 0.81,2.86 | 1.57                                                   | 0.83,2.97 | 1.33                                            | 0.71,2.53 | 1.55                                                   | 0.82,2.94 | 1.50                                            | 0.70,3.22 | 1.55                                    | 0.70,3.42 |
| dTGA     | 1                | 1.73                                           | 0.70,4.29 | 1.33                                    | 0.61,2.89 | 1.73                                                   | 0.80,3.75 | 1.59                                            | 0.74,3.42 | 1.40                                                   | 0.64,3.05 | 2.25                                            | 0.95,5.33 | 1.56                                    | 0.60,4.07 |
| Other    |                  |                                                |           |                                         |           |                                                        |           |                                                 |           |                                                        |           |                                                 |           |                                         |           |
| Cono.    | 1                | 0.62                                           | 0.15,2.66 | 0.89                                    | 0.33,2.42 | 0.95                                                   | 0.34,2.63 | 1.03                                            | 0.38,2.78 | 0.98                                                   | 0.36,2.68 | 0.76                                            | 0.20,2.91 | 1.17                                    | 0.33,4.15 |
| TAPVR    | 1                | 2.15                                           | 0.63,7.33 | 1.12                                    | 0.37,3.37 | 0.59                                                   | 0.17,1.99 | 0.60                                            | 0.19,1.96 | 1.44                                                   | 0.48,4.30 | 1.34                                            | 0.37,4.87 | 0.88                                    | 0.19,4.03 |

Abbreviations: ASD-atrial septal defect; COA-coarctation of the aorta; dTGA-d-transposition of the great arteries; HLHS-hypoplastic left heart syndrome; NO<sub>2</sub>-nitrogen dioxide; Other Cono.-other conotruncal defects; PVS-pulmonary valve stenosis; TAPVR-total anomalous pulmonary venous return; TOF-tetralogy of Fallot; VSDpm-perimembranous ventricular septal defect.

<sup>a</sup>Estimates result from first-stage logistic regression model, adjusted for maternal race/ethnicity, age, education, household income, tobacco and alcohol use during pregnancy, use of folic acid supplements one month prior to conception and site-specific ratio of septal cases to total congenital heart defect cases.

<sup>b</sup>Referent group for all comparisons is NO<sub>2</sub> exposure less than the 10<sup>th</sup> centile and all nutrients (choline, methionine, dietary folate equivalents, vitamin B<sub>6</sub> and vitamin B<sub>12</sub>) intake at or greater than the 25<sup>th</sup> centile.

**Web Table 4:** Adjusted<sup>a</sup> Odds Ratios (OR) and 95% Confidence Intervals (CI) between Congenital Heart Defects and Categories of NO<sub>2</sub> Exposure and Dietary Intake of Methionine by Value of Second-stage Variance ( $\tau^2$ ), National Birth Defects Prevention Study 1997-2006.

| Defect          | Value of second-stage variance | Ref <sup>b</sup> | <10 <sup>th</sup> centile NO <sub>2</sub> , Low Methionine |           |      | 10-<50 <sup>th</sup> centile NO <sub>2</sub> , High Methionine |      | 10-<50 <sup>th</sup> centile NO <sub>2</sub> , Low Methionine |      | 50-<90 <sup>th</sup> centile NO <sub>2</sub> , High Methionine |      | 50-<90 <sup>th</sup> centile NO <sub>2</sub> , Low Methionine |      | ≥90 <sup>th</sup> centile NO <sub>2</sub> , High Methionine |      | ≥90 <sup>th</sup> centile NO <sub>2</sub> , Low Methionine |    |
|-----------------|--------------------------------|------------------|------------------------------------------------------------|-----------|------|----------------------------------------------------------------|------|---------------------------------------------------------------|------|----------------------------------------------------------------|------|---------------------------------------------------------------|------|-------------------------------------------------------------|------|------------------------------------------------------------|----|
|                 |                                |                  | OR                                                         | OR        | CI   | OR                                                             | CI   | OR                                                            | CI   | OR                                                             | CI   | OR                                                            | CI   | OR                                                          | CI   | OR                                                         | CI |
| ASD             | 0.25                           | 1                | 0.96                                                       | 0.46,2.01 | 1.20 | 0.78,1.84                                                      | 1.19 | 0.72,1.96                                                     | 1.04 | 0.67,1.61                                                      | 1.21 | 0.73,1.98                                                     | 1.01 | 0.58,1.77                                                   | 1.54 | 0.77,3.10                                                  |    |
|                 | 0.50                           | 1                | 0.91                                                       | 0.42,1.98 | 1.20 | 0.78,1.84                                                      | 1.19 | 0.72,1.96                                                     | 1.04 | 0.67,1.61                                                      | 1.21 | 0.73,1.99                                                     | 1.00 | 0.56,1.76                                                   | 1.59 | 0.77,3.28                                                  |    |
|                 | 0.83                           | 1                | 0.90                                                       | 0.41,1.97 | 1.20 | 0.78,1.84                                                      | 1.19 | 0.72,1.97                                                     | 1.04 | 0.67,1.61                                                      | 1.21 | 0.73,1.99                                                     | 0.99 | 0.56,1.76                                                   | 1.60 | 0.77,3.36                                                  |    |
| VSDpm           | 0.25                           | 1                | 1.07                                                       | 0.49,2.31 | 1.28 | 0.82,1.99                                                      | 1.56 | 0.95,2.56                                                     | 1.24 | 0.80,1.94                                                      | 1.49 | 0.91,2.45                                                     | 1.12 | 0.64,1.97                                                   | 3.05 | 1.66,5.60                                                  |    |
|                 | 0.50                           | 1                | 0.98                                                       | 0.44,2.22 | 1.28 | 0.82,1.99                                                      | 1.56 | 0.95,2.57                                                     | 1.24 | 0.80,1.94                                                      | 1.49 | 0.91,2.45                                                     | 1.10 | 0.62,1.94                                                   | 3.23 | 1.74,6.01                                                  |    |
|                 | 0.83                           | 1                | 0.95                                                       | 0.42,2.18 | 1.28 | 0.82,1.99                                                      | 1.56 | 0.95,2.57                                                     | 1.25 | 0.80,1.94                                                      | 1.49 | 0.90,2.46                                                     | 1.09 | 0.61,1.94                                                   | 3.30 | 1.77,6.15                                                  |    |
| Aortic Stenosis | 0.25                           | 1                | 2.04                                                       | 0.73,5.69 | 1.16 | 0.50,2.67                                                      | 1.15 | 0.45,2.98                                                     | 1.21 | 0.53,2.76                                                      | 0.90 | 0.33,2.39                                                     | 1.58 | 0.63,3.98                                                   | 1.19 | 0.34,4.14                                                  |    |
|                 | 0.50                           | 1                | 2.26                                                       | 0.78,6.54 | 1.16 | 0.50,2.68                                                      | 1.12 | 0.42,2.96                                                     | 1.21 | 0.53,2.78                                                      | 0.82 | 0.30,2.28                                                     | 1.61 | 0.63,4.13                                                   | 0.99 | 0.23,4.24                                                  |    |
|                 | 0.83                           | 1                | 2.35                                                       | 0.80,6.91 | 1.16 | 0.50,2.68                                                      | 1.11 | 0.42,2.96                                                     | 1.21 | 0.53,2.79                                                      | 0.80 | 0.29,2.23                                                     | 1.62 | 0.63,4.18                                                   | 0.90 | 0.19,4.27                                                  |    |
| COA             | 0.25                           | 1                | 3.18                                                       | 1.09,9.23 | 1.99 | 0.84,4.71                                                      | 3.58 | 1.47,8.74                                                     | 2.90 | 1.25,6.76                                                      | 2.97 | 1.21,7.31                                                     | 2.86 | 1.13,7.27                                                   | 4.32 | 1.55,12.0                                                  |    |
|                 | 0.50                           | 1                | 3.18                                                       | 1.06,9.59 | 1.97 | 0.83,4.66                                                      | 3.61 | 1.47,8.85                                                     | 2.92 | 1.25,6.80                                                      | 2.96 | 1.20,7.33                                                     | 2.83 | 1.11,7.26                                                   | 4.50 | 1.57,12.9                                                  |    |
|                 | 0.83                           | 11               | 3.18                                                       | 1.04,9.72 | 1.96 | 0.83,4.64                                                      | 3.62 | 1.48,8.89                                                     | 2.92 | 1.25,6.80                                                      | 2.96 | 1.20,7.34                                                     | 2.82 | 1.10,7.25                                                   | 4.58 | 1.58,13.3                                                  |    |
| HLHS            | 0.25                           | 1                | 1.32                                                       | 0.52,3.37 | 1.26 | 0.67,2.38                                                      | 1.74 | 0.87,3.47                                                     | 1.33 | 0.70,2.50                                                      | 1.27 | 0.62,2.59                                                     | 1.15 | 0.53,2.50                                                   | 1.11 | 0.38,3.20                                                  |    |
|                 | 0.50                           | 1                | 1.30                                                       | 0.49,3.50 | 1.26 | 0.67,2.39                                                      | 1.77 | 0.88,3.54                                                     | 1.33 | 0.71,2.51                                                      | 1.26 | 0.61,2.59                                                     | 1.12 | 0.51,2.47                                                   | 0.93 | 0.28,3.09                                                  |    |
|                 | 0.83                           | 1                | 1.30                                                       | 0.47,3.55 | 1.27 | 0.67,2.39                                                      | 1.78 | 0.89,3.57                                                     | 1.33 | 0.71,2.52                                                      | 1.26 | 0.61,2.60                                                     | 1.11 | 0.50,2.47                                                   | 0.86 | 0.24,3.03                                                  |    |
| PVS             | 0.25                           | 1                | 1.29                                                       | 0.58,2.89 | 1.16 | 0.69,1.94                                                      | 1.54 | 0.87,2.72                                                     | 1.29 | 0.77,2.16                                                      | 1.44 | 0.81,2.56                                                     | 1.57 | 0.86,2.89                                                   | 2.57 | 1.26,5.22                                                  |    |
|                 | 0.50                           | 1                | 1.24                                                       | 0.53,2.88 | 1.15 | 0.68,1.94                                                      | 1.53 | 0.86,2.73                                                     | 1.29 | 0.77,2.17                                                      | 1.44 | 0.81,2.56                                                     | 1.57 | 0.85,2.91                                                   | 2.72 | 1.31,5.65                                                  |    |
|                 | 0.83                           | 1                | 1.21                                                       | 0.51,2.87 | 1.15 | 0.68,1.94                                                      | 1.53 | 0.86,2.74                                                     | 1.29 | 0.77,2.17                                                      | 1.44 | 0.81,2.57                                                     | 1.57 | 0.85,2.92                                                   | 2.77 | 1.33,5.80                                                  |    |
| Atresia         | 0.25                           | 1                | 1.00                                                       | 0.30,3.28 | 1.04 | 0.45,2.39                                                      | 1.16 | 0.46,2.97                                                     | 0.76 | 0.32,1.81                                                      | 0.92 | 0.35,2.43                                                     | 1.16 | 0.44,3.05                                                   | 0.98 | 0.28,3.42                                                  |    |
|                 | 0.50                           | 1                | 0.97                                                       | 0.26,3.59 | 1.05 | 0.45,2.43                                                      | 1.18 | 0.46,3.08                                                     | 0.75 | 0.31,1.80                                                      | 0.91 | 0.34,2.45                                                     | 1.18 | 0.43,3.19                                                   | 0.85 | 0.20,3.63                                                  |    |
|                 | 0.83                           | 1                | 0.95                                                       | 0.24,3.74 | 1.05 | 0.45,2.44                                                      | 1.19 | 0.46,3.12                                                     | 0.75 | 0.31,1.80                                                      | 0.90 | 0.33,2.46                                                     | 1.19 | 0.43,3.25                                                   | 0.79 | 0.17,3.74                                                  |    |
| TOF             | 0.25                           | 1                | 1.53                                                       | 0.73,3.19 | 1.33 | 0.81,2.16                                                      | 1.27 | 0.73,2.23                                                     | 1.12 | 0.68,1.83                                                      | 1.52 | 0.89,2.61                                                     | 1.24 | 0.68,2.26                                                   | 1.57 | 0.75,3.31                                                  |    |
|                 | 0.50                           | 1                | 1.55                                                       | 0.72,3.31 | 1.33 | 0.82,2.16                                                      | 1.27 | 0.72,2.23                                                     | 1.12 | 0.68,1.83                                                      | 1.52 | 0.89,2.62                                                     | 1.23 | 0.67,2.25                                                   | 1.58 | 0.72,3.44                                                  |    |
|                 | 0.83                           | 1                | 1.55                                                       | 0.72,3.35 | 1.33 | 0.82,2.16                                                      | 1.26 | 0.72,2.23                                                     | 1.12 | 0.68,1.83                                                      | 1.53 | 0.89,2.63                                                     | 1.22 | 0.67,2.25                                                   | 1.58 | 0.72,3.48                                                  |    |

| Defect     | Value of second-stage variance | Ref <sup>b</sup> | <10 <sup>th</sup> centile        |           | 10-<50 <sup>th</sup> centile      |           | 10-<50 <sup>th</sup> centile     |           | 50-<90 <sup>th</sup> centile      |           | 50-<90 <sup>th</sup> centile     |           | ≥90 <sup>th</sup> centile         |           | ≥90 <sup>th</sup> centile        |           |
|------------|--------------------------------|------------------|----------------------------------|-----------|-----------------------------------|-----------|----------------------------------|-----------|-----------------------------------|-----------|----------------------------------|-----------|-----------------------------------|-----------|----------------------------------|-----------|
|            |                                |                  | NO <sub>2</sub> , Low Methionine |           | NO <sub>2</sub> , High Methionine |           | NO <sub>2</sub> , Low Methionine |           | NO <sub>2</sub> , High Methionine |           | NO <sub>2</sub> , Low Methionine |           | NO <sub>2</sub> , High Methionine |           | NO <sub>2</sub> , Low Methionine |           |
|            |                                |                  | OR                               | CI        | OR                                | CI        | OR                               | CI        | OR                                | CI        | OR                               | CI        | OR                                | CI        | OR                               | CI        |
| dTGA       |                                |                  |                                  |           |                                   |           |                                  |           |                                   |           |                                  |           |                                   |           |                                  |           |
|            | 0.25                           | 1                | 2.19                             | 0.94,5.07 | 1.44                              | 0.77,2.71 | 1.70                             | 0.85,3.43 | 1.63                              | 0.87,3.05 | 1.13                             | 0.54,2.37 | 2.13                              | 1.05,4.29 | 1.40                             | 0.52,3.80 |
|            | 0.50                           | 1                | 2.29                             | 0.96,5.43 | 1.44                              | 0.76,2.71 | 1.70                             | 0.84,3.45 | 1.64                              | 0.87,3.06 | 1.08                             | 0.51,2.30 | 2.16                              | 1.06,4.38 | 1.23                             | 0.41,3.69 |
|            | 0.83                           | 1                | 2.32                             | 0.97,5.57 | 1.44                              | 0.76,2.71 | 1.70                             | 0.84,3.46 | 1.64                              | 0.88,3.07 | 1.07                             | 0.50,2.27 | 2.17                              | 1.07,4.41 | 1.16                             | 0.37,3.64 |
| Other Cono |                                |                  |                                  |           |                                   |           |                                  |           |                                   |           |                                  |           |                                   |           |                                  |           |
|            | 0.25                           | 1                | 1.20                             | 0.35,4.09 | 1.07                              | 0.44,2.63 | 1.29                             | 0.48,3.45 | 1.05                              | 0.43,2.57 | 1.63                             | 0.64,4.19 | 1.20                              | 0.43,3.36 | 1.34                             | 0.40,4.49 |
|            | 0.50                           | 1                | 1.15                             | 0.30,4.40 | 1.07                              | 0.44,2.63 | 1.29                             | 0.47,3.51 | 1.05                              | 0.43,2.58 | 1.69                             | 0.65,4.36 | 1.17                              | 0.40,3.40 | 1.27                             | 0.33,4.83 |
|            | 0.83                           | 1                | 1.12                             | 0.28,4.54 | 1.07                              | 0.44,2.63 | 1.29                             | 0.47,3.53 | 1.05                              | 0.43,2.58 | 1.70                             | 0.66,4.42 | 1.17                              | 0.40,3.42 | 1.24                             | 0.31,5.00 |
| TAPVR      |                                |                  |                                  |           |                                   |           |                                  |           |                                   |           |                                  |           |                                   |           |                                  |           |
|            | 0.25                           | 1                | 1.14                             | 0.40,3.29 | 0.72                              | 0.32,1.62 | 0.58                             | 0.21,1.61 | 0.70                              | 0.31,1.58 | 0.78                             | 0.31,1.96 | 0.90                              | 0.35,2.29 | 0.79                             | 0.23,2.68 |
|            | 0.50                           | 1                | 1.27                             | 0.42,3.89 | 0.72                              | 0.32,1.63 | 0.51                             | 0.17,1.53 | 0.70                              | 0.31,1.60 | 0.77                             | 0.30,2.01 | 0.91                              | 0.35,2.40 | 0.69                             | 0.17,2.90 |
|            | 0.83                           | 1                | 1.33                             | 0.42,4.18 | 0.72                              | 0.32,1.64 | 0.49                             | 0.16,1.49 | 0.70                              | 0.31,1.60 | 0.77                             | 0.29,2.03 | 0.92                              | 0.35,2.44 | 0.65                             | 0.14,3.01 |

Abbreviations: ASD-atrial septal defect;; COA-coarctation of the aorta;; dTGA-d-transposition of the great arteries; HLHS-hypoplastic left heart syndrome; NO<sub>2</sub>-nitrogen dioxide; Other Cono.-other conotruncal defects; PVS-pulmonary valve stenosis; TAPVR-total anomalous pulmonary venous return; TOF-tetralogy of Fallot; VSDpm-perimembranous ventricular septal defect.

<sup>a</sup> Models adjusted for maternal race/ethnicity, age, education, household income, tobacco and alcohol use during pregnancy, use of folic acid supplements one month prior to conception and site-specific ratio of septal cases to total congenital heart defect cases.

<sup>b</sup> Referent group for all comparisons is NO<sub>2</sub> exposure less than the 10<sup>th</sup> centile and methionine intake at or greater than the 25<sup>th</sup> centile.
